# Supplementary material for: The Glyoxalase System in Age-Related Diseases: Nutritional Intervention as Anti-Ageing Strategy
Source: MDPI journal article supplement (doi:10.3390/cells10081852), 2021-07-22
Supplement: s1 [file s1]

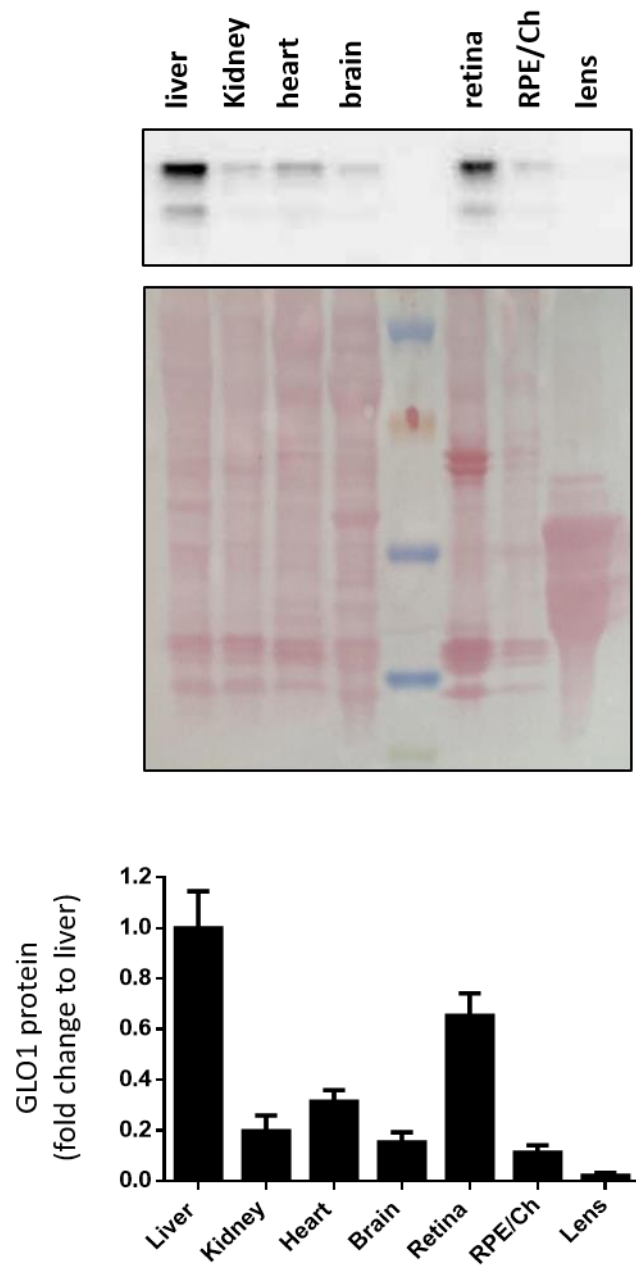

**Figure S1.** Differential expression of GLO1 in mouse tissues. (A) Representative western blot analysis of non-ocular (left) and ocular (right) tissue extracts (50 ug/lane) using a polyclonal antibody for GLO1 (commercial, GeneTex) and (B) protein quantification of GLO1 expressed as fold change to liver ( $n = 3$ ). Data shown are mean  $\pm$  standard errors of the means (SEM).
